# Supplementary material for: An investigation of the thermo-mechanical features of Laohugou Glacier No. 12 in Mt. Qilian Shan, western China, using a two-dimensional first-order flow-band ice flow model
Source: Copernicus journal article supplement (doi:10.5194/tc-2016-38), 2016-03-04
Supplement: Supplementary file [file tc-2016-38-AC6-supplement.pdf]

# Response to Referee Martin Lüthi

Yuzhe Wang

We thank the reviewer very much for the positive and encouraging comments of our manuscript.

## **Specific comments**

*p7, 21 say 61 grid points or “61 grid cells”*  
Changed.

*p7, 25 you could add that “Details are given in Zhang et al. (2013)”.*  
Included. Thanks.

*p7, 28 change “described in above” to “described above”*  
Fixed.
